# Supplementary material for: Nucleobase-functionalized acrylic ABA triblock copolymers and supramolecular blends
Source: Royal Society of Chemistry journal article supplement (doi:10.1039/c4py01798f), 2015-01-01
Supplement: c4py01798f1.pdf [file c4py01798f1.pdf]

## Supplementary Information

for

# Nucleobase-Functionalized Acrylic ABA Triblock Copolymers and Supramolecular Blends

*Keren Zhang,<sup>a</sup> Motohiro Aiba,<sup>b</sup> Gregory B. Fahs,<sup>a</sup> Amanda G. Hudson,<sup>a</sup> William D. Chiang,<sup>a</sup> Robert B.*

*Moore,<sup>a</sup> Mitsuru Ueda,<sup>b</sup> and Timothy E. Long<sup>\*a</sup>*

*<sup>a</sup> Department of Chemistry, Macromolecules and Interfaces Institute*

*Virginia Tech, Blacksburg, VA 24061, USA*

*<sup>b</sup> Department of Organic and Polymeric Materials, Graduate School of Science and Engineering, Tokyo*

*Institute of Technology, 2-12-1, O-okayama, Meguro-ku, Tokyo 152-8552, Japan*

**Analytical Methods.** WAXD were performed using a Rigaku S-Max 3000 3 pinhole SAXS system, equipped with a rotating anode emitting X-rays with a wavelength of 0.154 nm (Cu K $\alpha$ ). Scattering from a silver behenate standard was used to calibrate the sample-to-detector distance. For WAXD, the sample-to-detector distance was 80.0 mm. WAXD two-dimensional diffraction patterns were obtained using an image plate, with an exposure time of 2 hours. All WAXD data were analyzed using the SAXSGUI software package to obtain azimuthal averaged WAXD intensity versus  $2\theta$  profiles, where  $\theta$  is one half of the scattering angle. WAXD profiles were vertically shifted to facilitate a comparison of the peak positions.

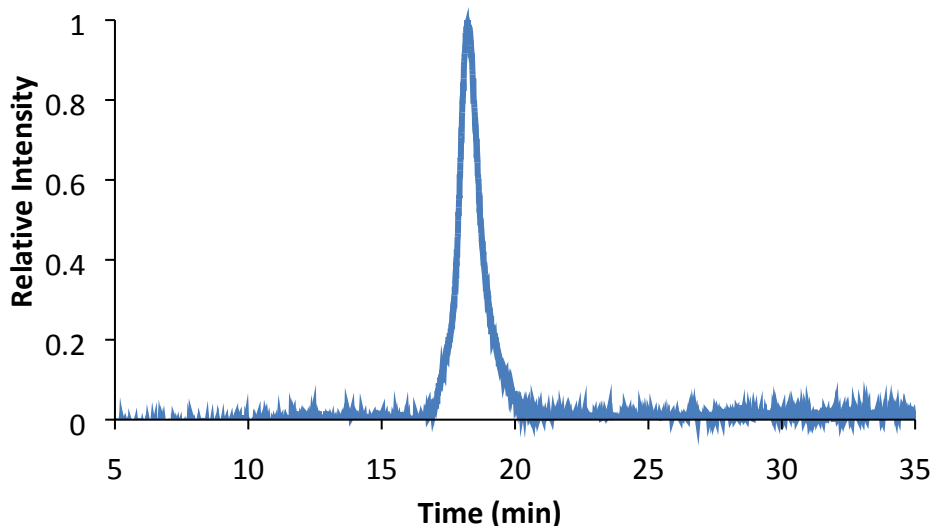

**Figure S1.** SEC trace of poly(*n*BA) difunctional macro-initiator.

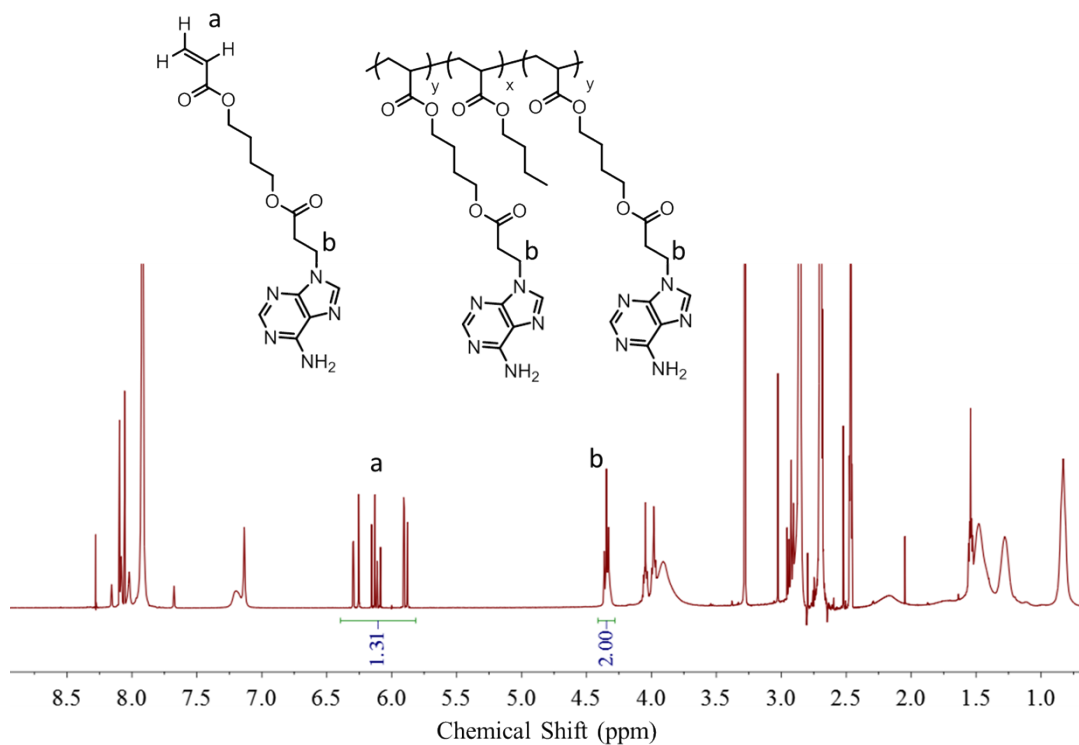

**Figure S2.**  $^1\text{H}$  NMR spectrum of reaction mixture after 2<sup>nd</sup> RAFT polymerization step of adenine block. The integrations of peak a and b were used to calculate conversion.

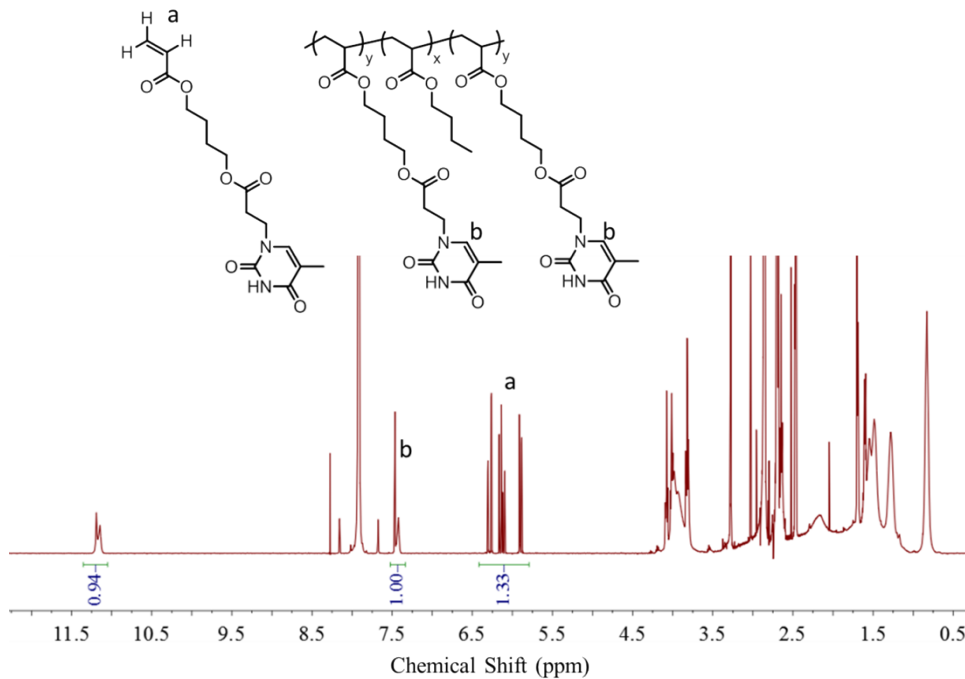

**Figure S3.**  $^1\text{H}$  NMR spectrum of reaction mixture after 2<sup>nd</sup> RAFT polymerization step of thymine block. The integrations of peak a and b were used to calculate conversion.

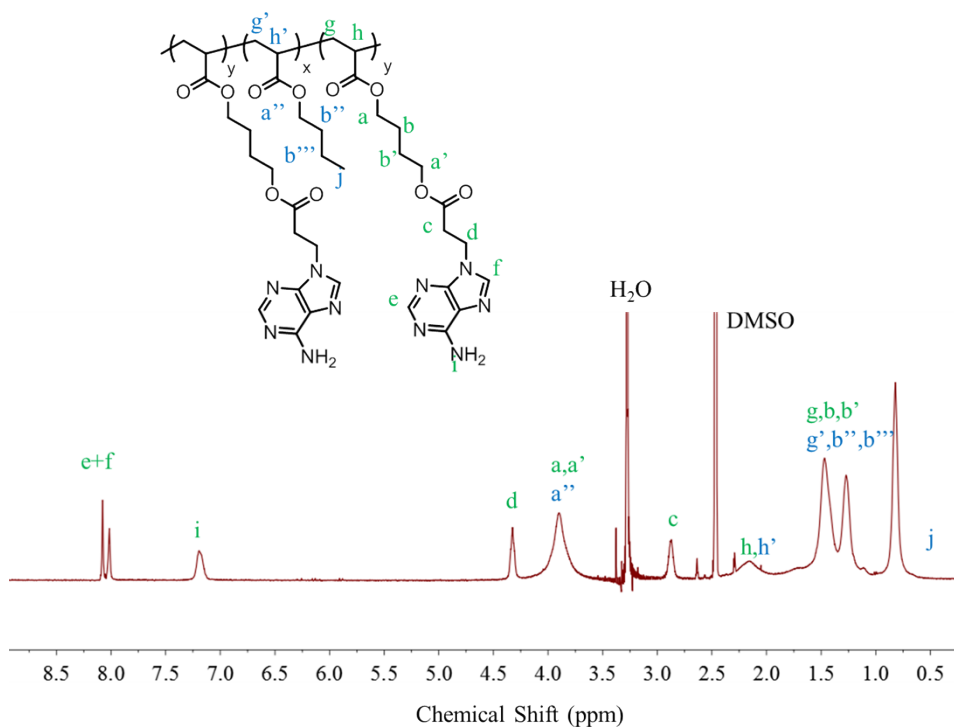

**Figure S4.**  $^1\text{H}$  NMR spectrum of poly(AdA-*b*-*n*BA-*b*-AdA) with 19 mol% adenine.

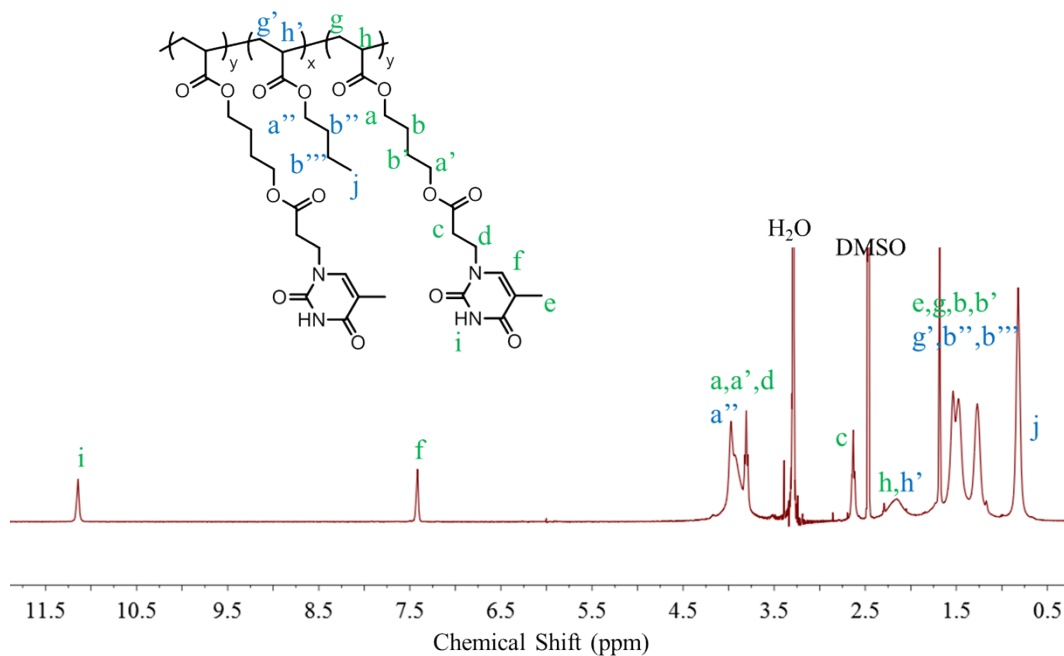

**Figure S5.**  $^1\text{H}$  NMR spectrum of poly(ThA-*b*-*n*BA-*b*-ThA) with 21 mol% thymine.

**Table S1.** DP and molecular weight from  $^1\text{H}$  NMR spectrums. All data were based on the second RAFT polymerization step in Scheme 1, polymerization of AdA/ThA external block with P*n*BA macro-CTA. Conversion refers to the AdA/ThA monomer conversion. DP refers to the degree of polymerization for the nucleobase-functionalized block. DP<sub>1</sub> was calculated from  $^1\text{H}$  NMR spectroscopic analysis of the reaction mixture immediately after polymerization through a comparison of monomer conversion and targeted molecular weight from feed. DP<sub>2</sub> was calculated from  $^1\text{H}$  NMR spectroscopic analysis of the purified copolymers, using the ratio of nucleobase-functionalized block to P*n*BA internal block.

|                                         | Conversion | Targeted Mn at 100% conversion | DP <sub>1</sub> | (Nucleobase: <i>n</i> BA) ratio of pure copolymer | DP <sub>2</sub> | Average DP | Molecular weight | Total molecular weight |
|-----------------------------------------|------------|--------------------------------|-----------------|---------------------------------------------------|-----------------|------------|------------------|------------------------|
| poly(AdA- <i>b-n</i> BA- <i>b</i> -AdA) | 56%        | 50.1 kDa                       | 84.5            | 4.3:1                                             | 81.3            | 83         | 27.6 kDa         | 72.4 kDa               |
| poly(ThA- <i>b-n</i> BA- <i>b</i> -ThA) | 56%        | 53.0 kDa                       | 91.1            | 3.7:1                                             | 94.6            | 93         | 30.1 kDa         | 74.9 kDa               |

The peak shift of amine group in the thymine was observed. The total concentration of adenine was varied, while that of thymine was held.

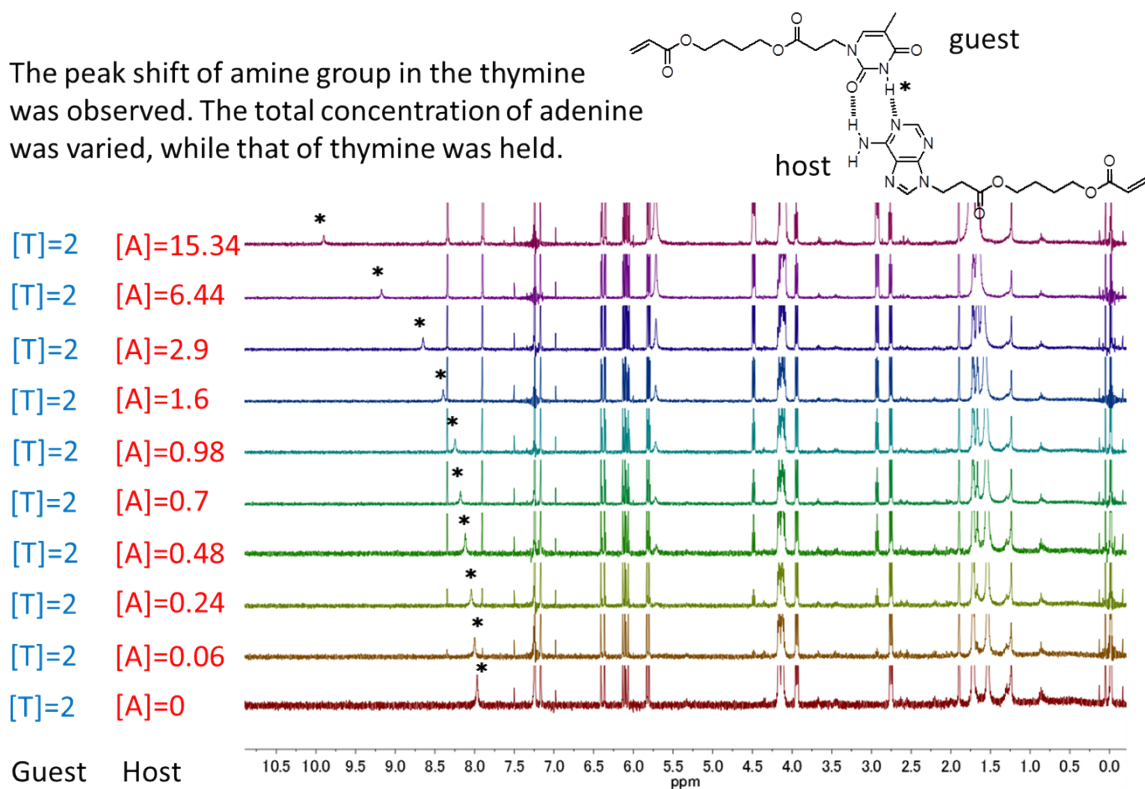

**Figure S6.**  $^1\text{H}$  NMR spectrum overlay of titration experiment with constant ThA concentration of 2 M and increasing AdA concentration from 0 M to 15.34 M.

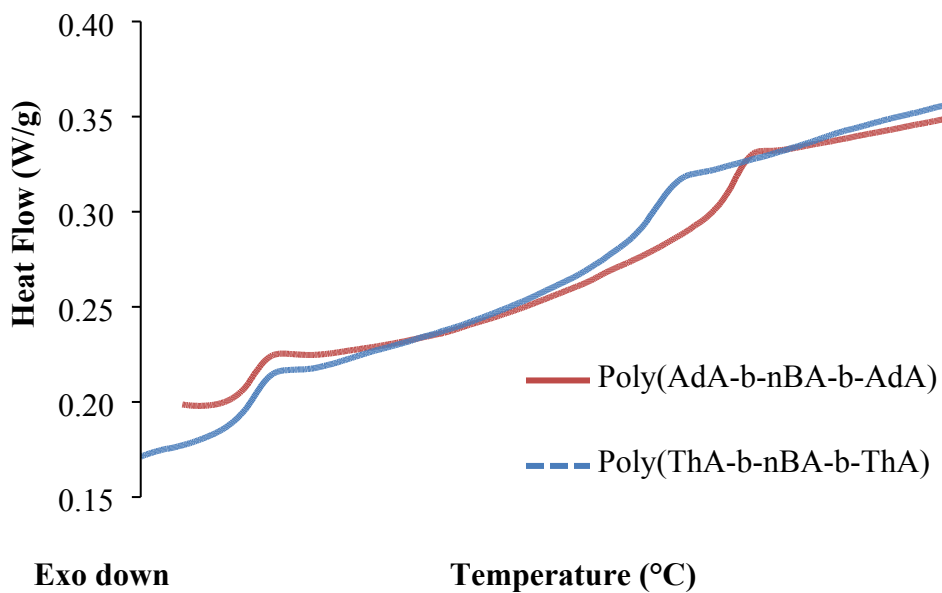

**Figure S7.** DSC 2<sup>nd</sup> heat of poly(ThA-*b*-nBA-*b*-ThA) and poly(AdA-*b*-nBA-*b*-AdA).

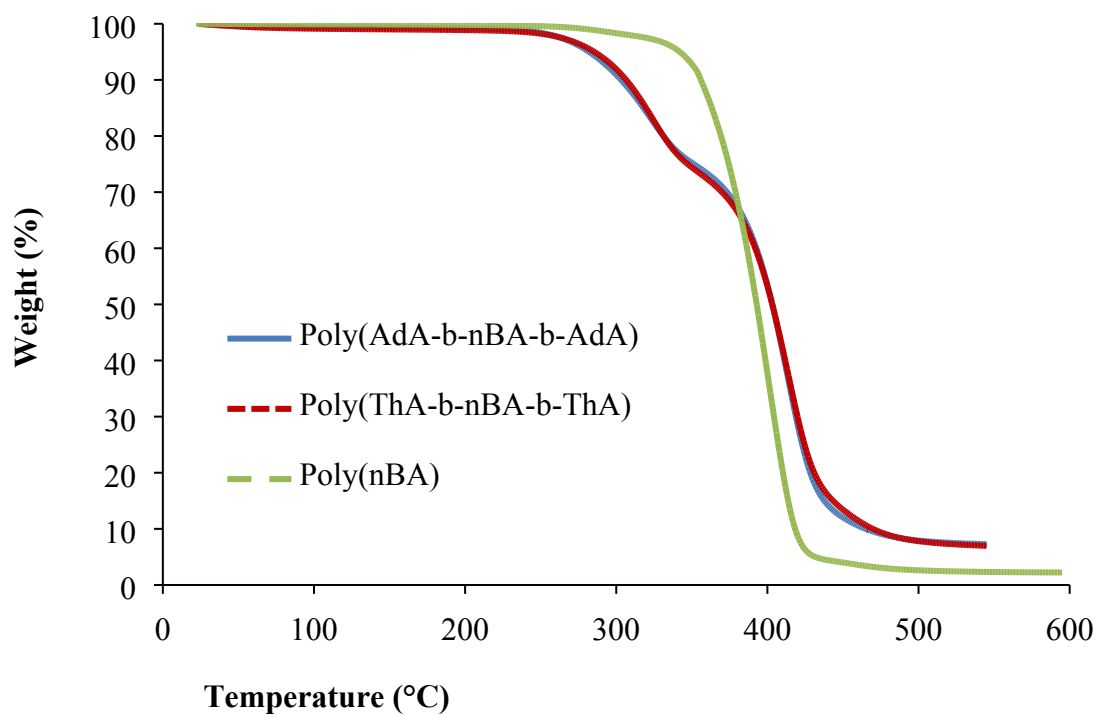

**Figure S8.** TGA traces of poly(ThA-*b*-nBA-*b*-ThA), poly(AdA-*b*-nBA-*b*-AdA), and poly(*n*BA).

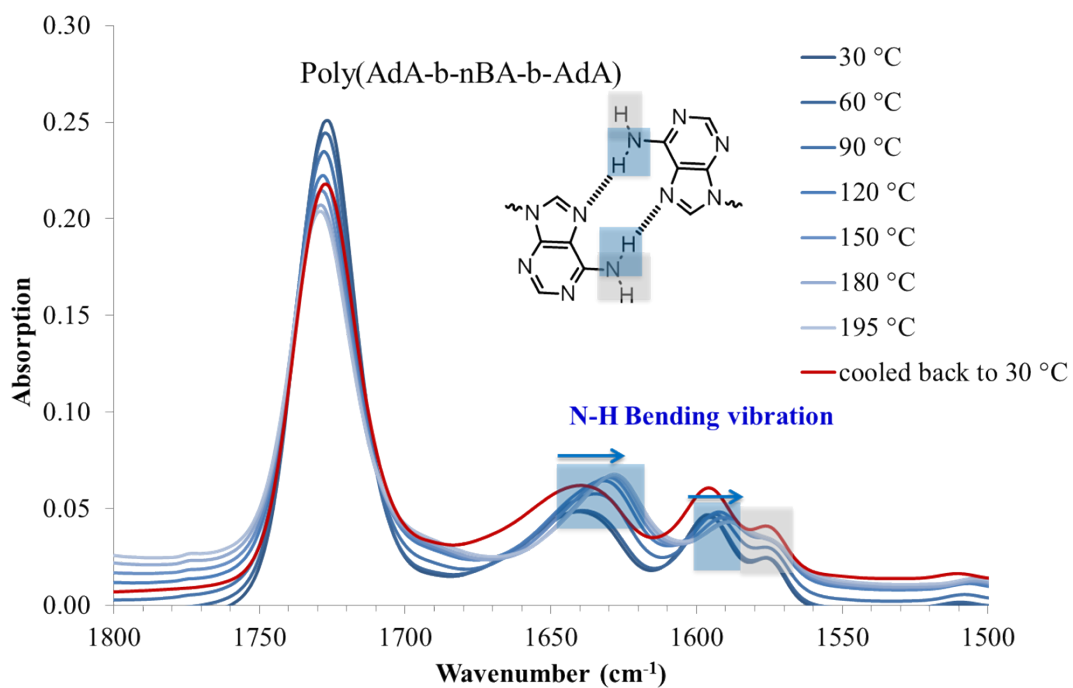

**Figure S9.** Variable temperature FT-IR spectra in the 1500-1800 cm<sup>-1</sup> region of poly(AdA-*b*-nBA-*b*-AdA).

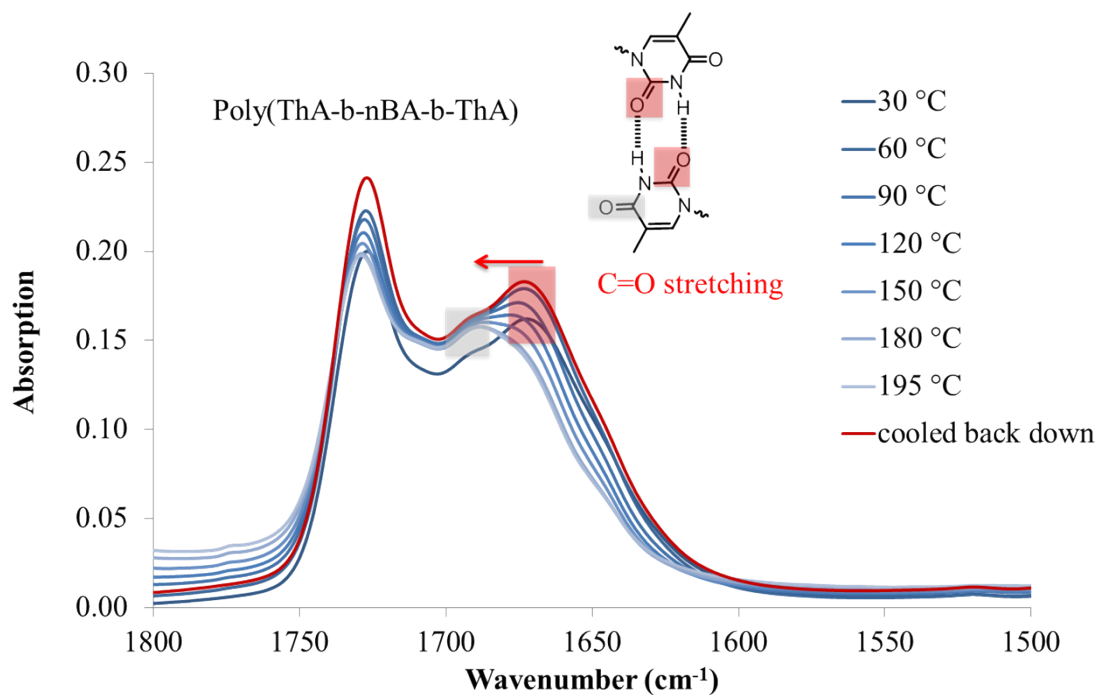

**Figure S10.** Variable temperature FT-IR spectra in the 1500-1800 cm<sup>-1</sup> region of poly(ThA-*b*-nBA-*b*-ThA).

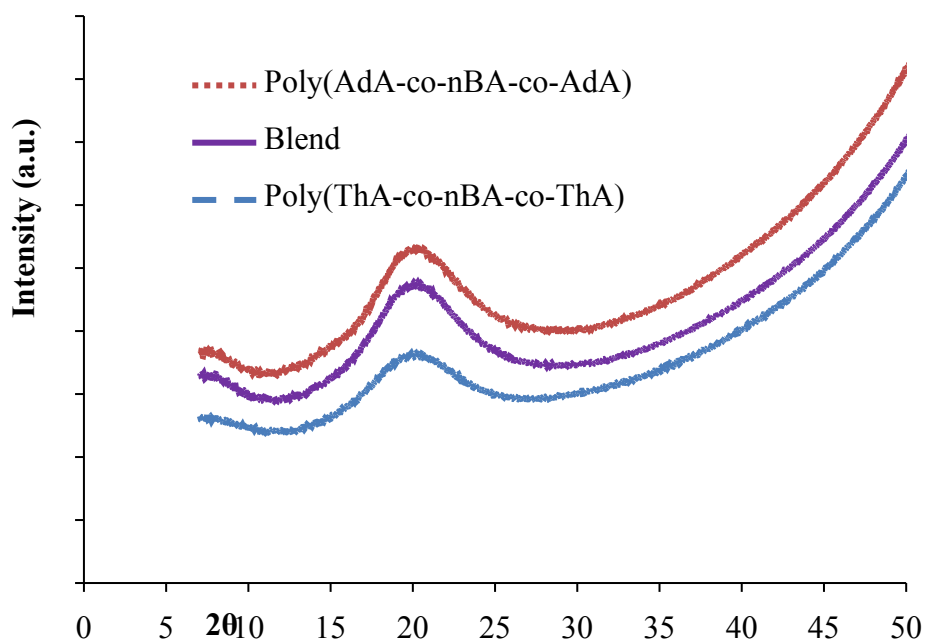

**Figure S11.** WAXD of solution-cast nucleobase-functionalized triblock copolymers and their blend. For clarity, data were shifted vertically by arbitrary factors.
